# Supplementary material for: Palladium and gold nanotube arrays with tuned surfaces for low-temperature hydrogen sensing
Source: Royal Society of Chemistry journal article supplement (doi:10.1039/d5tc03224e), 2025-01-01
Supplement: d5tc03224e1.pdf [file d5tc03224e1.pdf]

# Palladium and gold nanotube arrays with tuned surfaces for low-temperature hydrogen sensing

Zhenxu Li, Xinhua Zhao, Yi Zhang, Zhu Zhang, Tingting Wang, Dachi Yang\*

Tianjin Key Laboratory of Optoelectronic Sensor and Sensing Network Technology, and College of Electronic Information and Optical Engineering, Nankai University, Tianjin 300350, P. R. China

\* E-mail: yangdachi@nankai.edu.cn

## Outline

### Synthesis of AAO templates

**Fig. S1** The schematic diagram of the evaluation setup and the sensor prototype.

**Fig. S2** The SEM and EDS analysis results of (a) RB-PdAu NTs, (b) S-PdAu NTs, (c) Pd:Au = 10:10 and (d) Pd:Au = 10:15.

**Fig. S3** The elemental line-scanning curves of Pd and Au on the RB-PdAu NTs.

**Fig. S4** The EDS pattern of RB-PdAu NTs.

**Fig. S5** The comparison for H<sub>2</sub> bubbling between (a) PdCl<sub>2</sub> and (b) HAuCl<sub>4</sub>.

**Fig. S6** The raw data of RB-PdAu NTs to various concentrations H<sub>2</sub> at various temperatures.

**Fig. S7** The evaluation of RB-PdAu NTs after being exposed to low temperatures.

**Fig. S8** A screenshot of RB-PdAu NTs for H<sub>2</sub> sensing at 299 K as an example for reference.

**Fig. S9** The raw data of S-PdAu NTs for various concentrations of H<sub>2</sub> at various temperatures.

**Fig. S10** The long-term stability test of (a) RB-PdAu NTs and (b) S-PdAu NTs.

**Fig. S11** The response curves of (a) RB-PdAu NTs and (b) S-PdAu NTs toward various gases.

**Table S1** The quantitative comparison of response times for RB-PdAu NTs and S-PdAu NTs.

**Table S2** Comparison of response time between our study to other existing low-temperature sensors.

### **Synthesis of AAO templates**

The synthetic procedures of AAO templates are as follows. [1, 2] Firstly, high-purity aluminum foils (99.999%) are annealed at 500 °C for 5 hours to eliminate internal stress and improve plasticity. Secondly, the first anodization is conducted in 0.3 M oxalic acid solution at 10 °C under a constant voltage of 40 V for 4 hours. Thirdly, after removing the formed oxide layer in a mixed phosphoric-chromic acid solution, a second anodization is performed under the same conditions for 16 hours to obtain well-ordered nanochannels. Fourthly, the residual Al layer on the opposite side of the AAO is removed using a  $\text{SnCl}_4$  solution. Fifthly, the obtained template is immersed in 5 wt% phosphoric acid to obtain through-hole AAO. Finally, the AAO template was rinsed thoroughly with deionized water, dried completely, and sputtered with a thin Au layer to obtain the final AAO template.

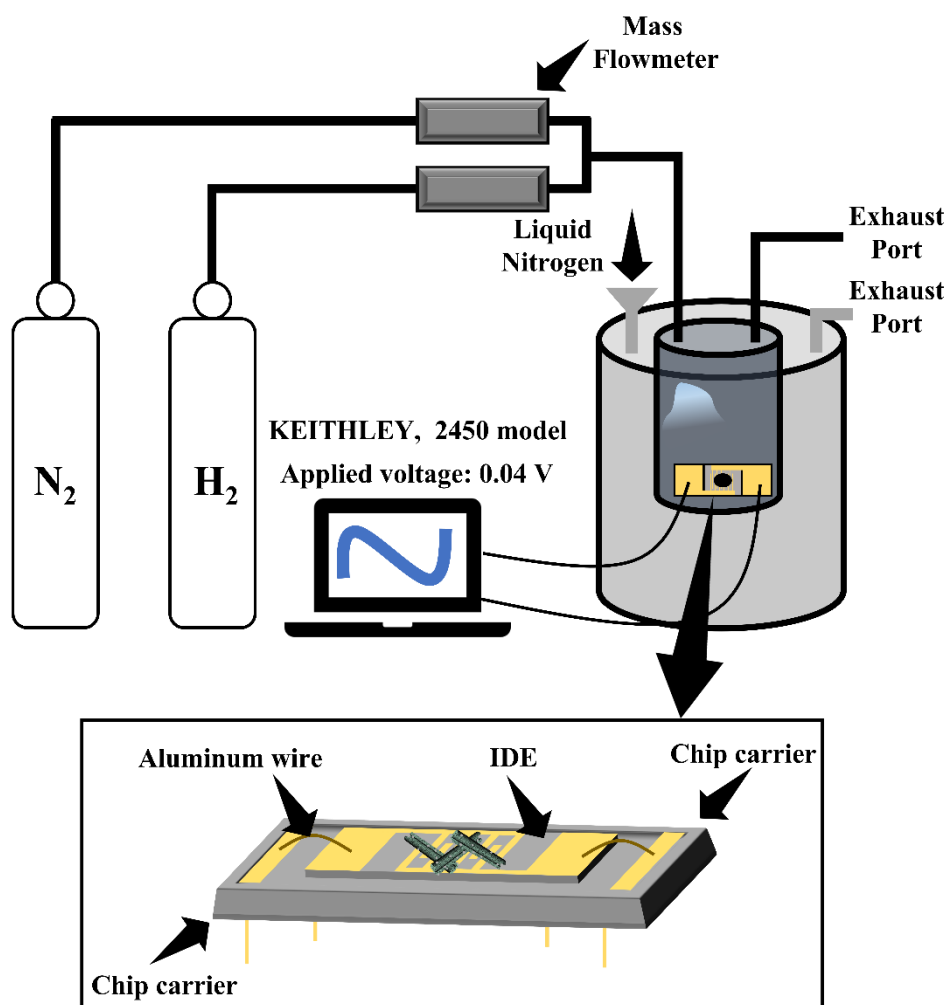

**Fig. S1** The schematic diagram of the evaluation setup for H<sub>2</sub> sensing and the sensor prototype built with RB-PdAu NTs.

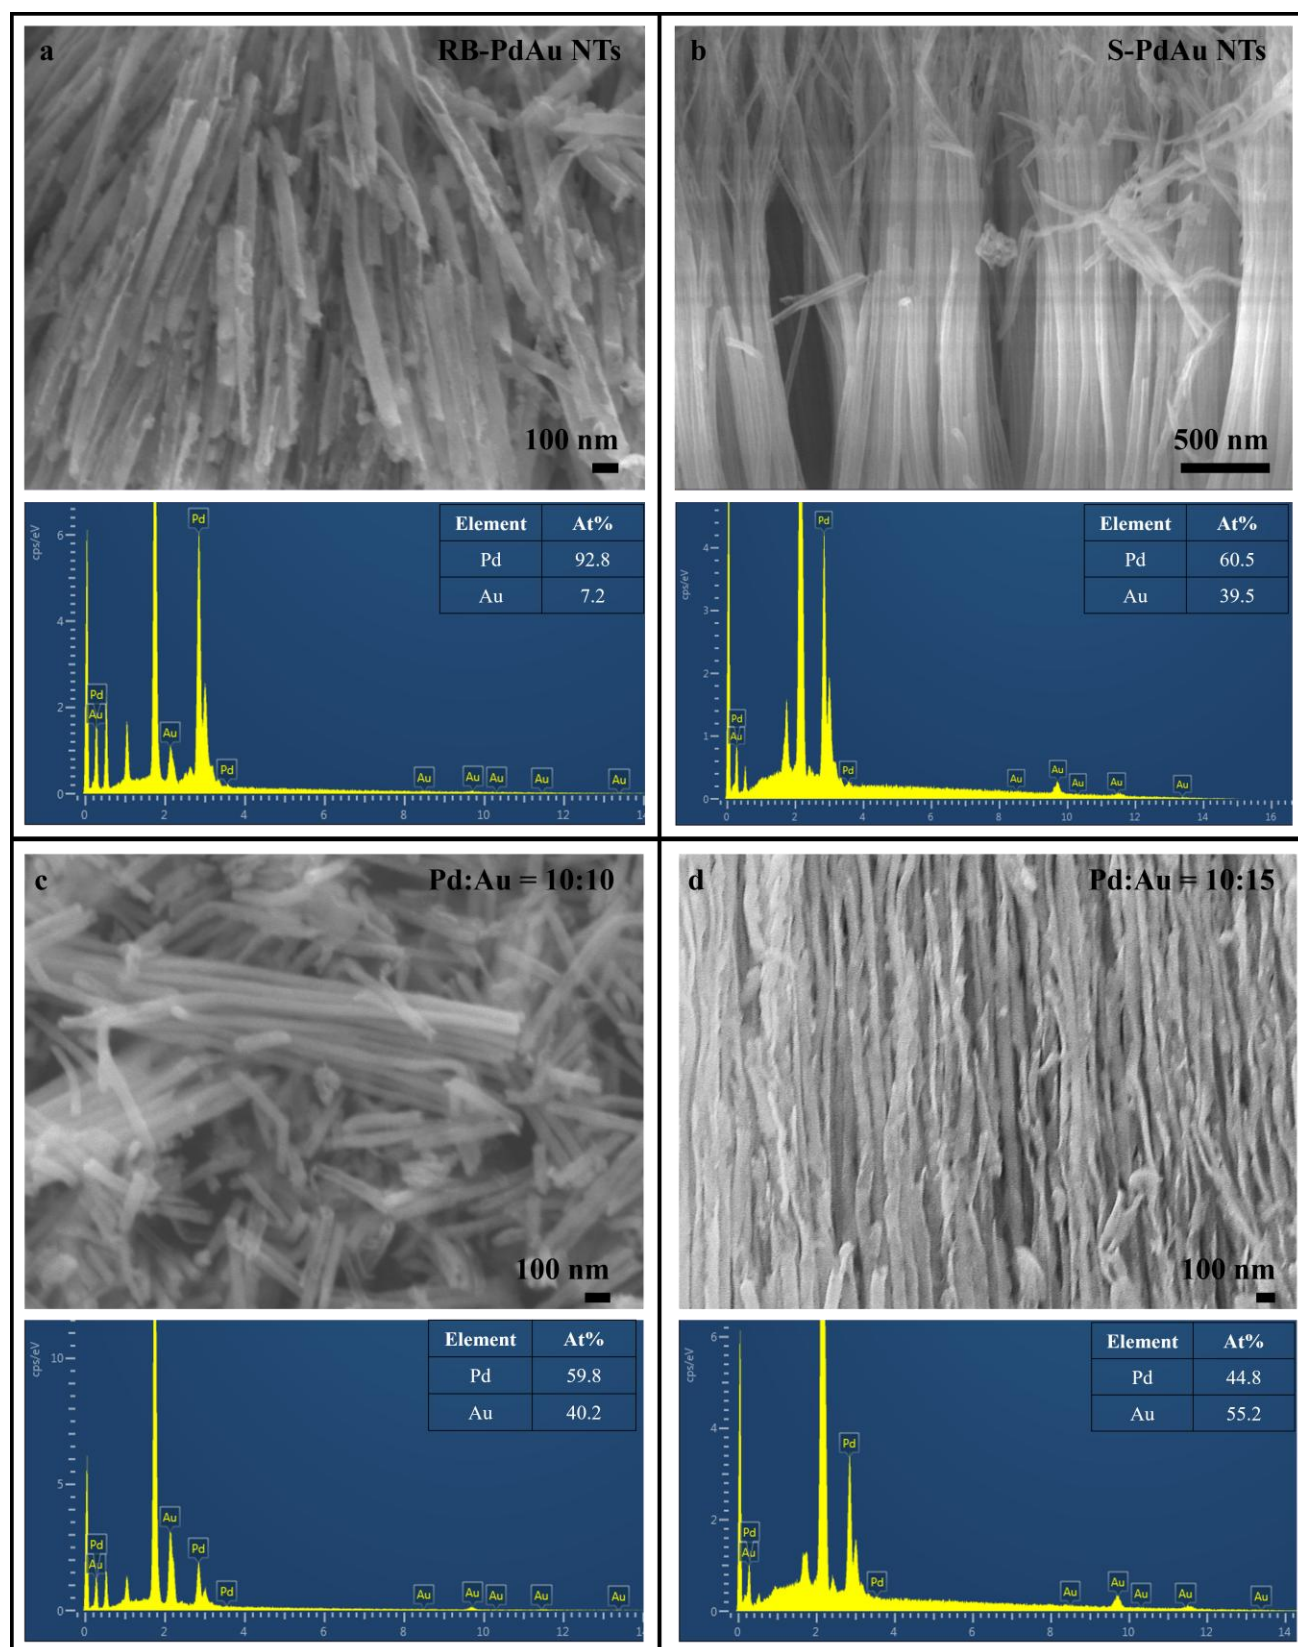

**Fig. S2** The SEM and EDS analysis results of (a) RB-PdAu NTs, (b) S-PdAu NTs, (c) Pd:Au = 10:10 and (d) Pd:Au = 10:15.

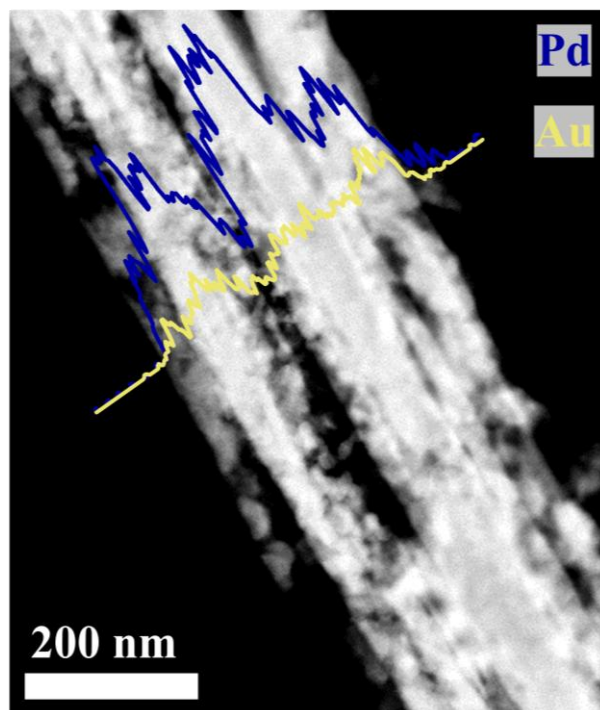

**Fig. S3** The elemental line-scanning curves of Pd and Au on the RB-PdAu NTs.

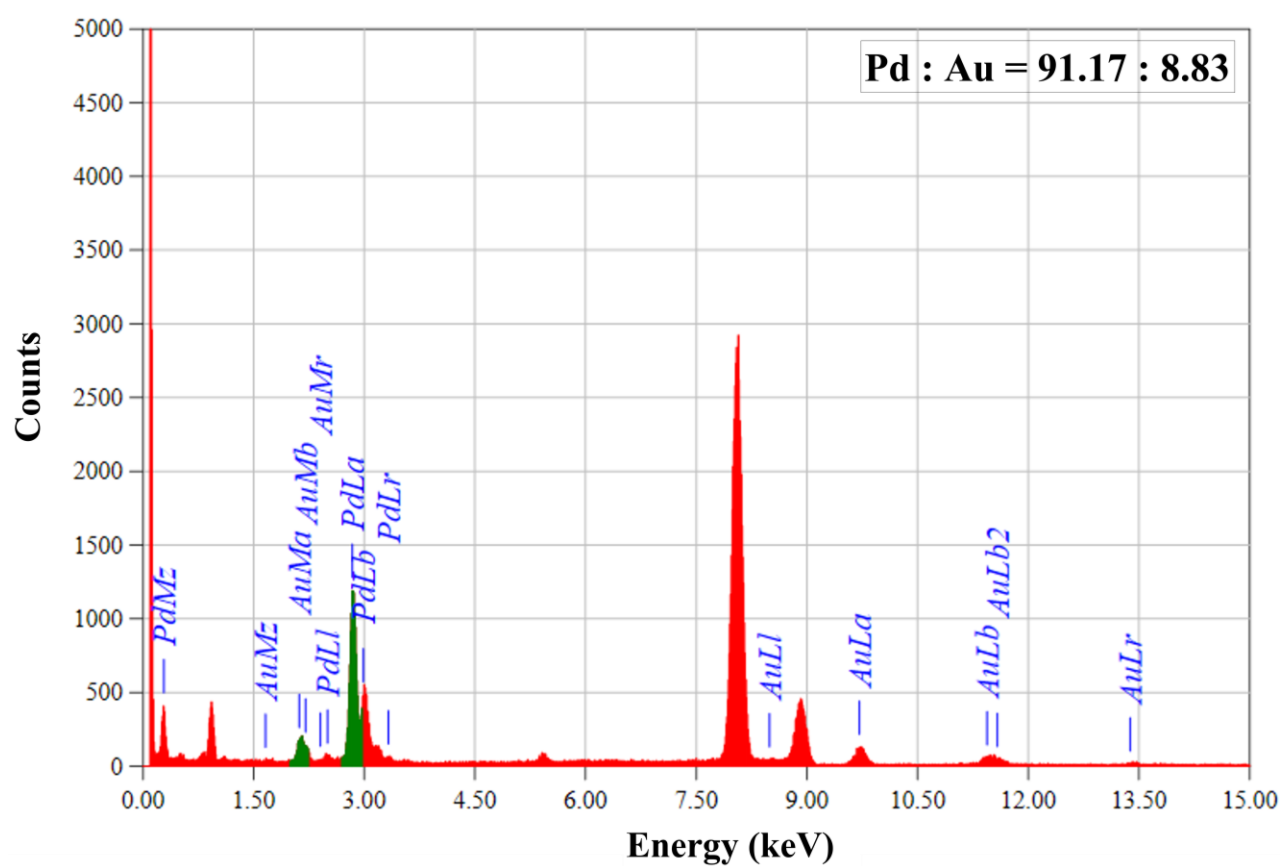

**Fig. S4** The EDS pattern of RB-PdAu NTs.

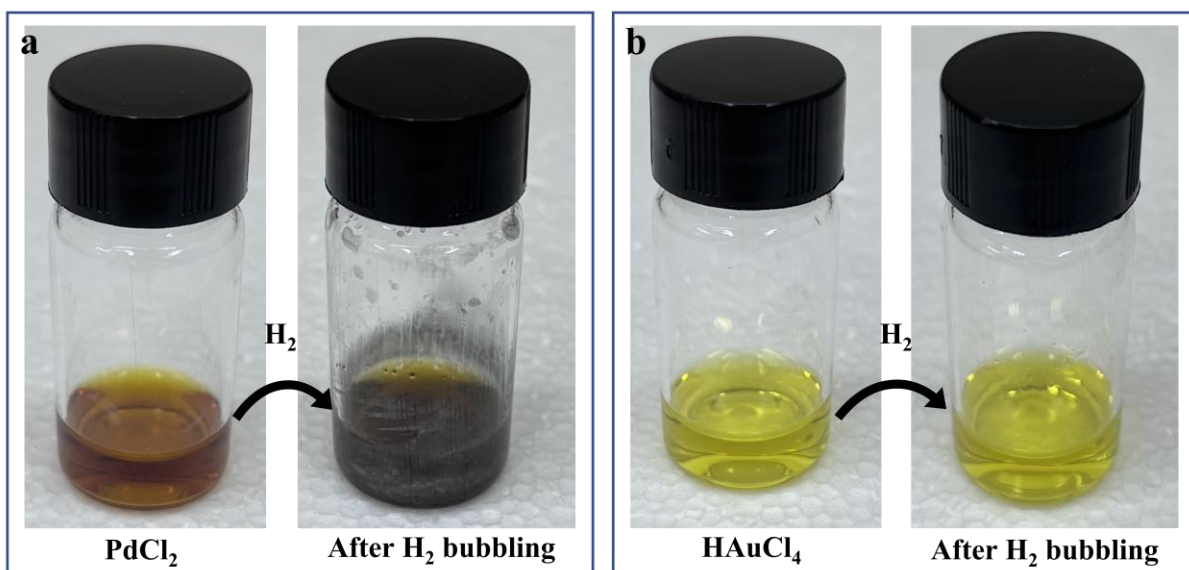

Fig. S5 The comparison for  $H_2$  bubbling between (a)  $PdCl_2$  and (b)  $HAuCl_4$ .

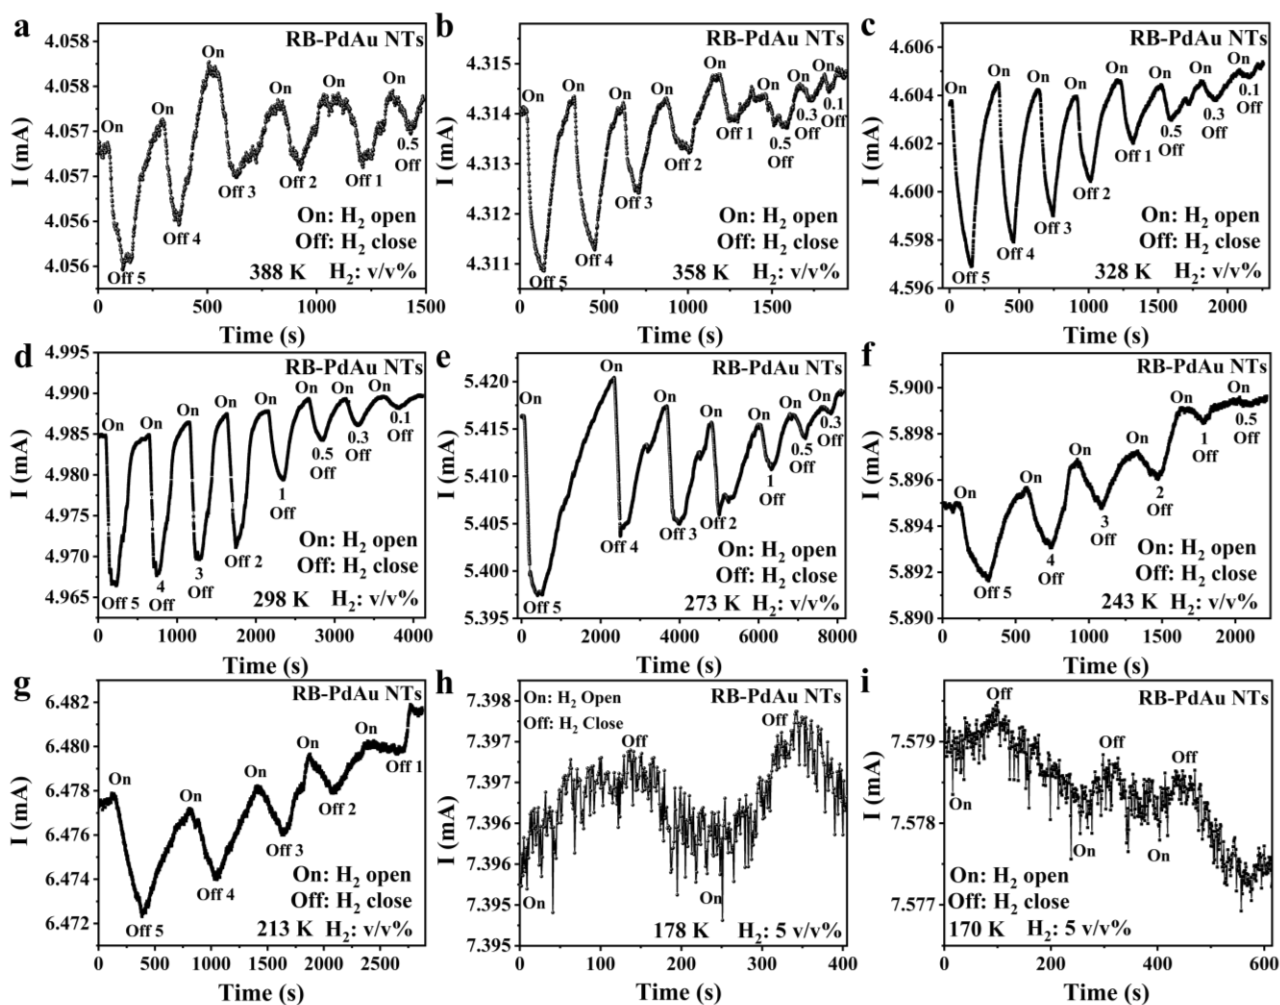

**Fig. S6** The raw data of RB-PdAu NTs to various concentrations  $H_2$  at various temperatures.



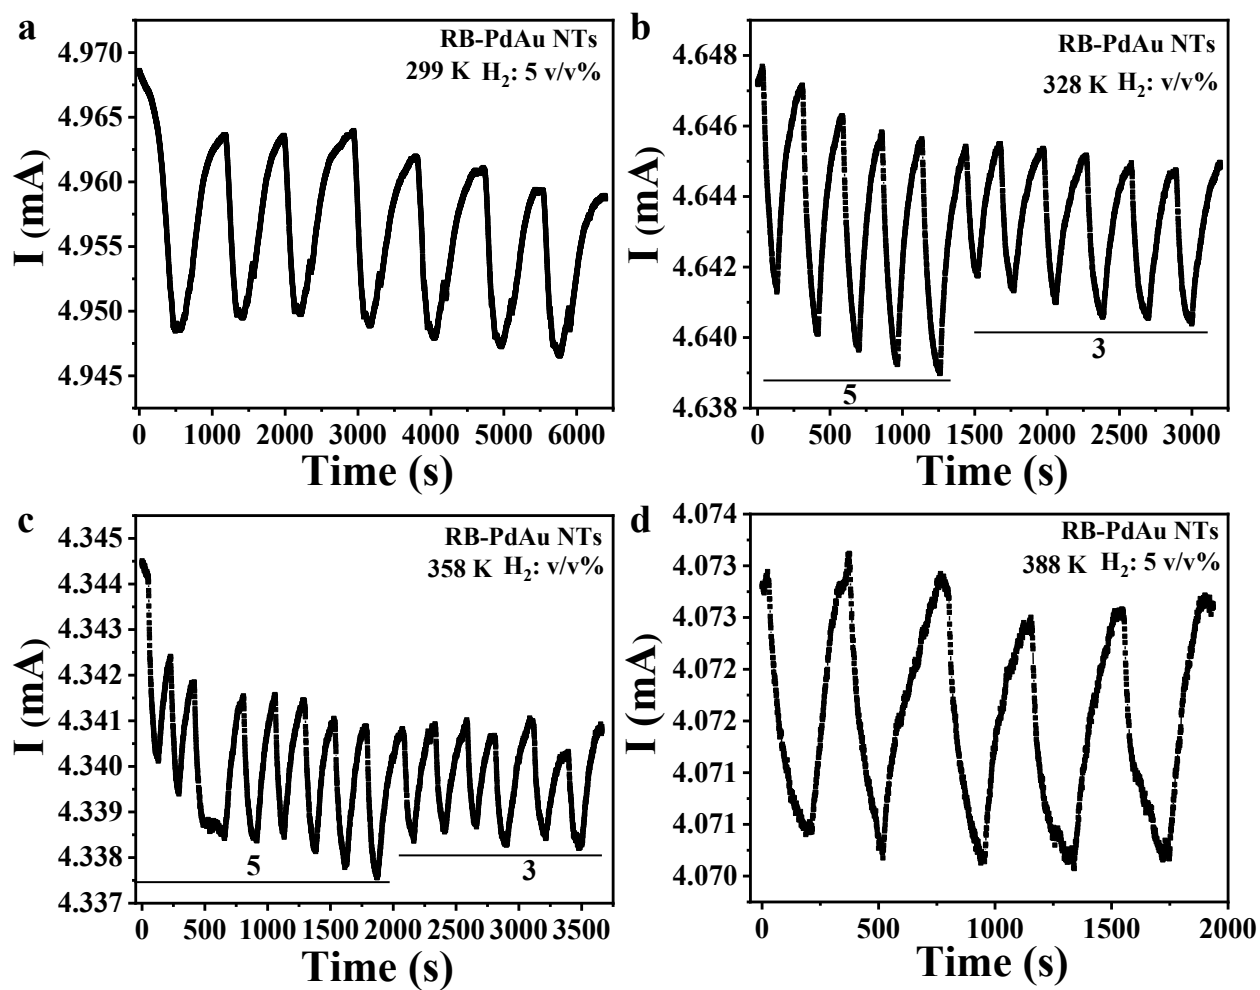

**Fig. S7** The evaluation of RB-PdAu NTs after being exposed in low temperatures.

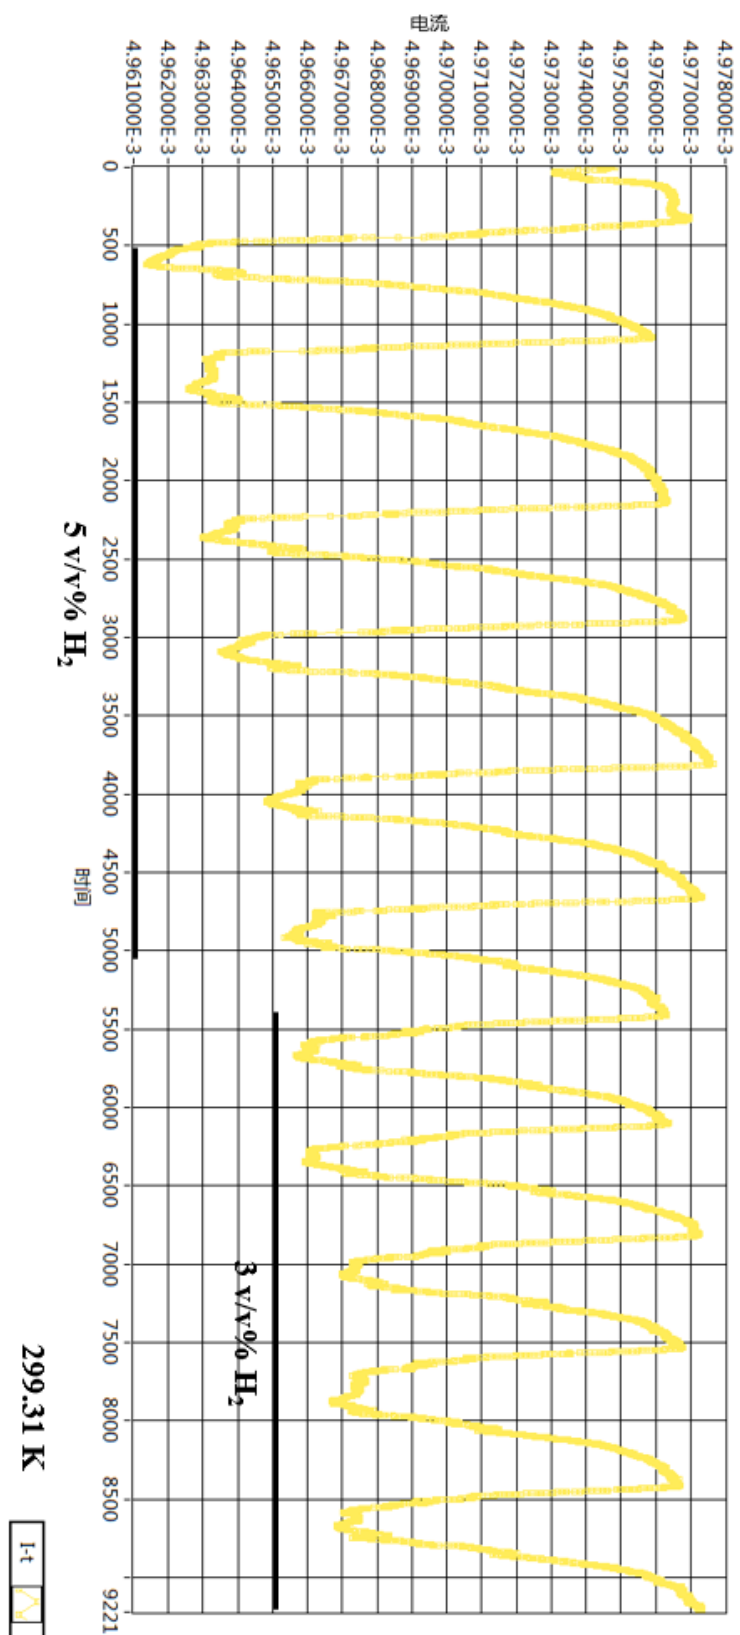

**Fig. S8** A screenshot of RB-PdAu NTs for H<sub>2</sub> sensing at 299 K as an example.

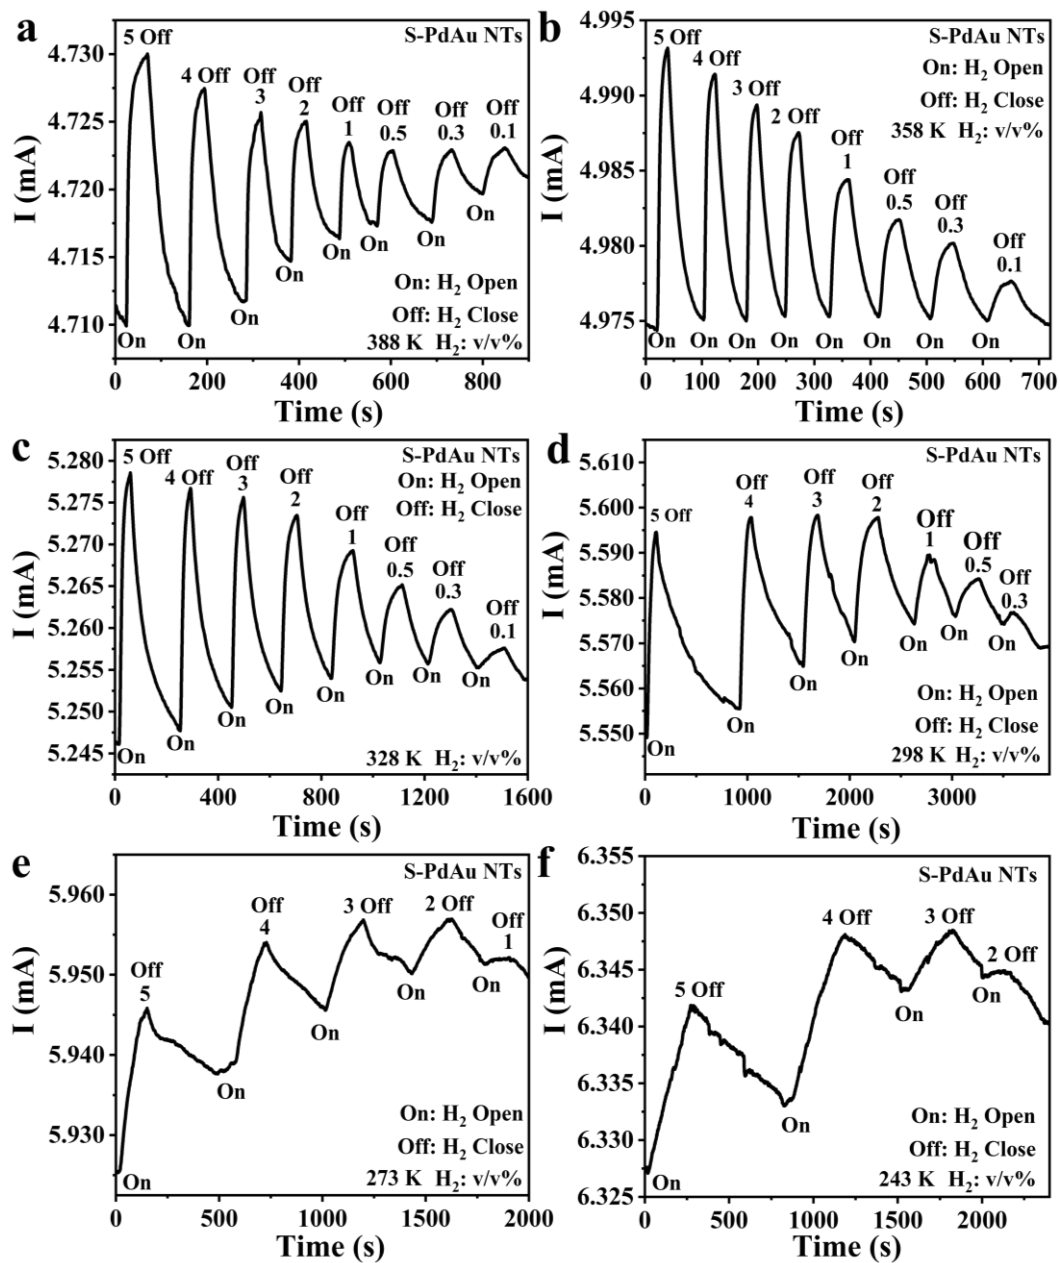

**Fig. S9** The raw data of S-PdAu NTs for various concentrations H<sub>2</sub> at various temperatures.

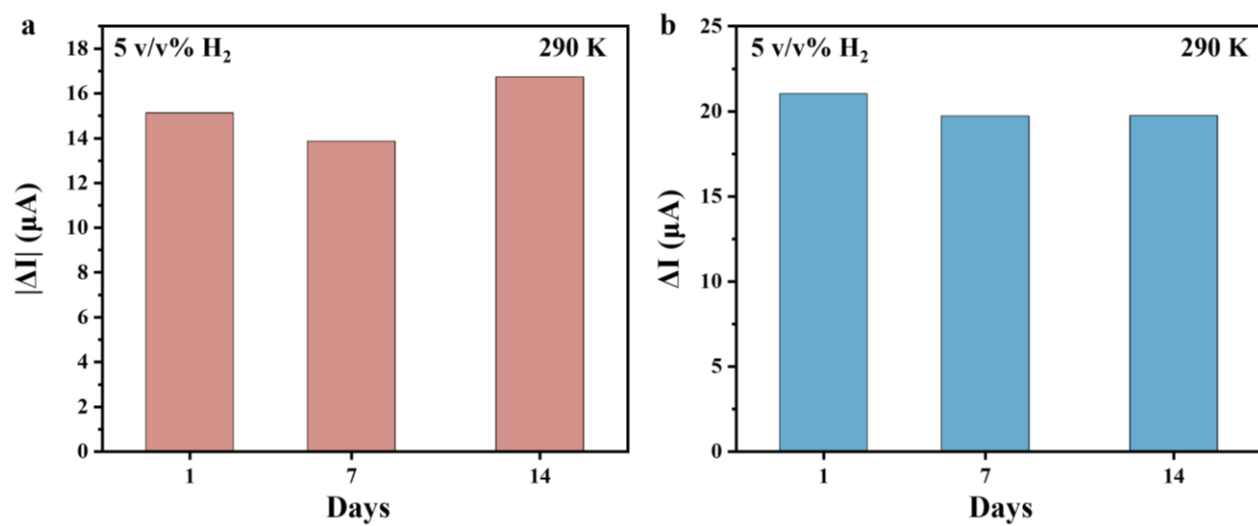

**Fig. S10** The long-term stability test. (a) RB-PdAu NTs and (b) S-PdAu NTs.

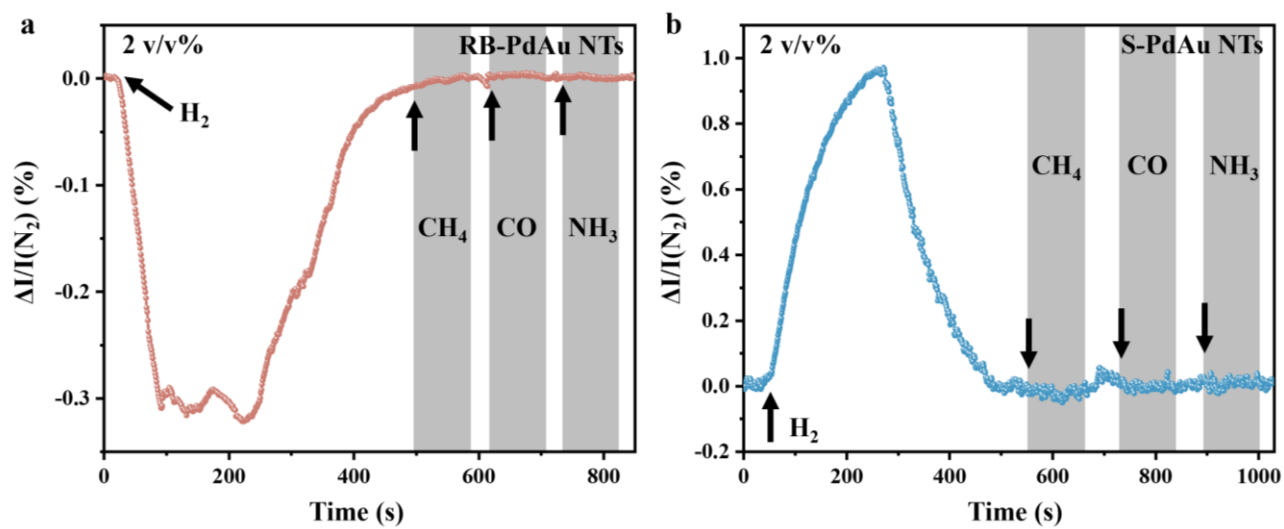

**Fig. S11** The response curves of (a) RB-PdAu NTs and (b) S-PdAu NTs toward various gases.

**Table S1** The quantitative comparison of response times for RB-PdAu NTs and S-PdAu NTs.

| Temperature   | 388 K                                        | 358 K   | 328 K    | 298 K     | 273 K     | 243 K     |
|---------------|----------------------------------------------|---------|----------|-----------|-----------|-----------|
| Concentration | Response time (s) – RB-PdAu NTs / S-PdAu NTs |         |          |           |           |           |
| 5 v/v%        | 53 / 28                                      | 53 / 12 | 110 / 26 | 47 / 65   | 209 / 101 | 140 / 230 |
| 4 v/v%        | 40 / 22                                      | 78 / 12 | 71 / 26  | 51 / 75   | 142 / 119 | 108 / 311 |
| 3 v/v%        | 47 / 21                                      | 50 / 11 | 67 / 26  | 63 / 94   | 135 / 153 | 100 / 205 |
| 2 v/v%        | 43 / 19                                      | 46 / 13 | 65 / 27  | 88 / 131  | 133 / 149 | 93 / 77   |
| 1 v/v%        | 50 / 10                                      | 32 / 17 | 53 / 51  | 109 / 115 | 145 / 85  | 78 / -    |

**Table S2** Comparison of response time between our study to other existing low-temperature sensors.

| Sensing Materials  | Response time (s) |            |            | References        |
|--------------------|-------------------|------------|------------|-------------------|
|                    | 3 v/v%            | 2 v/v%     | 1 v/v%     |                   |
| Pure Pd NWs        | ~420              | ~220       | ~132       | [1]               |
| Pd/Bi/Cu HNAs      | ~147              | ~155       | ~109       | [3]               |
| RS-PdBi NWs        | ~80               | ~150       | ~300       | [4]               |
| zeolite-AFI@Pd NPs | ~181              | ~204       | ~248       | [5]               |
| <b>RB-PdAu NWs</b> | <b>135</b>        | <b>133</b> | <b>145</b> | <b>This study</b> |
| <b>S-PdAu NWs</b>  | <b>153</b>        | <b>149</b> | <b>85</b>  |                   |

## References

1. D. Yang, L. Valentín, J. Carpena, W. Otaño, O. Resto, L.F. Fonseca, *Small*, 2013, **9**, 188-192.
2. D. Yang, J. Carpena-Núñez, L.F. Fonseca, A. Biaggi-Labiosa, G.W. Hunter, *Sci. Rep.*, 2014, **4**, 3773.
3. L. Zheng, S. Zheng, H. Wei, L. Du, Z. Zhu, J. Chen and D. Yang, *ACS Appl. Mater. Interfaces*, 2019, **11**, 6248-6256.
4. L. Du, L. Zheng, H. Wei, S. Zheng, Z. Zhu, J. Chen and D. Yang, *ACS Appl. Nano Mater.*, 2019, **2**, 1178-1184.
5. L. Du, M. Yuan, H. Wei, X. Xing, D. Feng, Y. Liao, H. Chen and D. Yang, *ACS Appl. Mater. Interfaces*, 2019, **11**, 36847 -36853.
